# Supplementary material for: Frequent activating STAT3 mutations and novel recurrent genomic abnormalities detected in breast implant-associated anaplastic large cell lymphoma
Source: PubMed Central journal article supplement (PMC6281423; doi:10.18632/oncotarget.26308), 2018-11-16
Supplement: oncotarget-09-36126-s001.pdf [file oncotarget-09-36126-s001.pdf]

## **Frequent activating STAT3 mutations and novel recurrent genomic abnormalities detected in breast implant-associated anaplastic large cell lymphoma**

### **SUPPLEMENTARY MATERIALS**

**Supplementary Table 1: Genes analysed by targeted sequencing.** See Supplementary\_Table\_1
